# Supplementary material for: The Metal Ion-Dependent Adhesion Site Motif of the Enterococcus faecalis EbpA Pilin Mediates Pilus Function in Catheter-Associated Urinary Tract Infection
Source: PubMed Central journal article supplement — mBio. 2012 Jul 24;3(4):e00177-12. doi: 10.1128/mBio.00177-12 (PMC3419518; doi:10.1128/mbio.00177-12), 2012-07-24
Supplement: mbo004121300st1.pdf [file mbo004121300st1.pdf]

**Table S1. Bacterial strains used in this study.**

|                                                                      | <b>Strain identifier</b> | <b>Strain common name used in main text (chromosomal antibiotic resistance<sup>a</sup>)</b> | <b>Relevant phenotypic/genotypic strain characteristics<sup>b</sup></b>                                                                         | <b>Plasmid(s) (section of Table S2)<sup>d</sup></b> | <b>Reference / source</b> |
|----------------------------------------------------------------------|--------------------------|---------------------------------------------------------------------------------------------|-------------------------------------------------------------------------------------------------------------------------------------------------|-----------------------------------------------------|---------------------------|
| <b>A. E. faecalis laboratory strains</b>                             | SJH-1994                 | OG1RF (Rif/Fus)                                                                             | EbpA <sup>+</sup> , EbpB <sup>+</sup> , EbpC <sup>+</sup> , SrtC <sup>+</sup> , SrtA <sup>+</sup>                                               | None                                                | (1)                       |
|                                                                      | SJH-1220                 | OG1X (Str)                                                                                  | EbpA <sup>+</sup> , EbpB <sup>+</sup> , EbpC <sup>+</sup> , SrtC <sup>+</sup> , SrtA <sup>+</sup>                                               | None                                                | (2)                       |
| <b>B. E. faecalis OG1RF markerless, in-frame chromosomal mutants</b> | SJH-953                  | SrtA <sup>-</sup> (Rif/Fus)                                                                 | EbpA <sup>+</sup> , EbpB <sup>+</sup> , EbpC <sup>+</sup> , SrtC <sup>+</sup> , SrtA <sup>-</sup> ( $\Delta$ srtA <sup>c</sup> )                | None                                                | (3)                       |
|                                                                      | SJH-1421                 | EbpC <sup>-</sup> (Rif/Fus)                                                                 | EbpA <sup>+</sup> , EbpB <sup>+</sup> , EbpC <sup>-</sup> , SrtC <sup>+</sup> , SrtA <sup>+</sup> ( $\Delta$ ebpC)                              | None                                                | This study                |
|                                                                      | SJH-1422                 | EbpABC <sup>-</sup> (Rif/Fus)                                                               | EbpA <sup>-</sup> , EbpB <sup>-</sup> , EbpC <sup>-</sup> , SrtC <sup>+</sup> , SrtA <sup>+</sup> ( $\Delta$ ebpABC)                            | None                                                | This study                |
|                                                                      | SJH-1424                 | SrtC <sup>-</sup> (Rif/Fus)                                                                 | EbpA <sup>+</sup> , EbpB <sup>+</sup> , EbpC <sup>+</sup> , SrtC <sup>-</sup> , SrtA <sup>+</sup> ( $\Delta$ srtC)                              | None                                                | This study                |
|                                                                      | SJH-1995                 | EbpABC <sup>-</sup> SrtC <sup>-</sup> (Rif/Fus)                                             | EbpA <sup>-</sup> , EbpB <sup>-</sup> , EbpC <sup>-</sup> , SrtC <sup>-</sup> , SrtA <sup>+</sup> ( $\Delta$ ebpABCsrtC)                        | None                                                | This study                |
|                                                                      | SJH-1996                 | EbpA <sup>-</sup> (Rif/Fus)                                                                 | EbpA <sup>-</sup> , EbpB <sup>+</sup> , EbpC <sup>+</sup> , SrtC <sup>+</sup> , SrtA <sup>+</sup> ( $\Delta$ ebpA)                              | None                                                | This study                |
|                                                                      | SJH-1997                 | EbpB <sup>-</sup> (Rif/Fus)                                                                 | EbpA <sup>+</sup> , EbpB <sup>-</sup> , EbpC <sup>+</sup> , SrtC <sup>+</sup> , SrtA <sup>+</sup> ( $\Delta$ ebpB)                              | None                                                | This study                |
|                                                                      | SJH-1998                 | EbpBC <sup>-</sup> (Rif/Fus)                                                                | EbpA <sup>+</sup> , EbpB <sup>-</sup> , EbpC <sup>-</sup> , SrtC <sup>+</sup> , SrtA <sup>+</sup> ( $\Delta$ ebpBC)                             | None                                                | This study                |
|                                                                      | SJH-1999                 | EbpAC <sup>-</sup> (Rif/Fus)                                                                | EbpA <sup>-</sup> , EbpB <sup>+</sup> , EbpC <sup>-</sup> , SrtC <sup>+</sup> , SrtA <sup>+</sup> ( $\Delta$ ebpA, $\Delta$ ebpC)               | None                                                | This study                |
|                                                                      | SJH-2000                 | EbpAB <sup>-</sup> (Rif/Fus)                                                                | EbpA <sup>-</sup> , EbpB <sup>-</sup> , EbpC <sup>+</sup> , SrtC <sup>+</sup> , SrtA <sup>+</sup> ( $\Delta$ ebpAB)                             | None                                                | This study                |
|                                                                      | SJH-2001                 | EbpA <sup>AWAGA</sup> (Rif/Fus)                                                             | EbpA <sup>D315A, S317A, S319A</sup> , EbpB <sup>+</sup> , EbpC <sup>+</sup> , SrtC <sup>+</sup> , SrtA <sup>+</sup> (ebpA <sup>AWAGA</sup> )    | None                                                | This study                |
|                                                                      | SJH-2010                 | SrtC <sup>-</sup> SrtA <sup>-</sup> (Rif/Fus)                                               | EbpA <sup>+</sup> , EbpB <sup>+</sup> , EbpC <sup>+</sup> , SrtC <sup>-</sup> , SrtA <sup>-</sup> ( $\Delta$ srtC, $\Delta$ srtA <sup>c</sup> ) | None                                                | This study                |
| <b>C. E. faecalis mutant strains with the empty vector</b>           | SJH-2020                 | EbpABC <sup>-</sup> /pGCP123 (Rif/Fus)                                                      | EbpA <sup>-</sup> , EbpB <sup>-</sup> , EbpC <sup>-</sup> , SrtC <sup>+</sup> , SrtA <sup>+</sup> ( $\Delta$ ebpABC)                            | pSJH-329 (D)                                        | This study                |
|                                                                      | SJH-2187                 | EbpABC <sup>-</sup> SrtC <sup>-</sup> /pGCP123 (Rif/Fus)                                    | EbpA <sup>-</sup> , EbpB <sup>-</sup> , EbpC <sup>-</sup> , SrtC <sup>-</sup> , SrtA <sup>+</sup> ( $\Delta$ ebpABCsrtC)                        | pSJH-329 (D)                                        | This study                |
| <b>D. E. faecalis mutant strains expressing ebp genes in trans</b>   | SJH-2011                 | EbpABC <sup>-</sup> / p-ebpABC (Rif/Fus)                                                    | EbpA <sup>+</sup> , EbpB <sup>+</sup> , EbpC <sup>+</sup> , SrtC <sup>+</sup> , SrtA <sup>+</sup> ( $\Delta$ ebpABC)                            | pSJH-491 (I)                                        | This study                |
|                                                                      | SJH-2014                 | EbpABC <sup>-</sup> /p-ebpAB (Rif/Fus)                                                      | EbpA <sup>+</sup> , EbpB <sup>+</sup> , EbpC <sup>-</sup> , SrtC <sup>+</sup> , SrtA <sup>+</sup> ( $\Delta$ ebpABC)                            | pSJH-492 (I)                                        | This study                |
|                                                                      | SJH-2030                 | EbpABC <sup>-</sup> SrtC <sup>-</sup> /p-ebpABCsrtC (Rif/Fus)                               | EbpA <sup>+</sup> , EbpB <sup>+</sup> , EbpC <sup>+</sup> , SrtC <sup>+</sup> , SrtA <sup>+</sup> ( $\Delta$ ebpABCsrtC)                        | pSJH-496 (I)                                        | This study                |
|                                                                      | SJH-2220                 | EbpABC <sup>-</sup> SrtC <sup>-</sup> /p-ebpA <sup>AWAGA</sup> BCsrtC (Rif/Fus)             | EbpA <sup>D315A, S317A, S319A</sup> , EbpB <sup>+</sup> , EbpC <sup>+</sup> , SrtC <sup>+</sup> , SrtA <sup>+</sup> ( $\Delta$ ebpABCsrtC)      | pSJH-559 (I)                                        | This study                |

|                                                                    | Strain identifier | Strain common name used in main text (chromosomal antibiotic resistance <sup>a</sup> ) | Relevant phenotypic/genotypic strain characteristics <sup>b</sup>                                                                                                                                                                         | Plasmid(s) (section of Table S2) <sup>c</sup> | Reference / source |
|--------------------------------------------------------------------|-------------------|----------------------------------------------------------------------------------------|-------------------------------------------------------------------------------------------------------------------------------------------------------------------------------------------------------------------------------------------|-----------------------------------------------|--------------------|
| <b>E. Commercial <i>E. coli</i> cloning strains</b>                | SJH-933           | TOP10                                                                                  | F <sup>'</sup> { <i>lacIq</i> , Tn10(Tet <sup>R</sup> )} <i>mcrA</i> Δ( <i>mrr-hsdRMS-mcrBC</i> ) Φ80 <i>lacZ</i> ΔM15 Δ <i>lacX74 recA1 araD139</i> Δ( <i>ara leu</i> ) 7697 <i>galU galK rpsL</i> (Str <sup>R</sup> ) <i>endA1 nupG</i> | None                                          | Invitrogen         |
|                                                                    | SJH-1887          | NovaBlue                                                                               | <i>endA1 hsdR17</i> (r <sub>K12</sub> <sup>-</sup> m <sub>K12</sub> <sup>+</sup> ) <i>supE44 thi-1 recA1 gyrA96 relA1 lac</i> F'[ <i>proA<sup>+</sup>B<sup>+</sup> lacI<sup>f</sup>ZΔM15::Tn10</i> ] (Tet <sup>R</sup> )                  | None                                          | Novagen            |
|                                                                    | SJH-1888          | XL1-Blue                                                                               | <i>endA1 gyrA96(nalR) thi-1 recA1 relA1 lac glnV44</i> F[ <i>::Tn10 proAB<sup>+</sup> lacI<sup>f</sup> Δ(lacZ)M15</i> ] <i>hsdR17</i> (r <sub>K</sub> <sup>-</sup> m <sub>K</sub> <sup>+</sup> )                                          | None                                          | Stratagene         |
| <b>F. Commercial <i>E. coli</i> expression strains</b>             | SJH-1889          | M15/pREP4                                                                              | NaI <sup>S</sup> , Str <sup>S</sup> , Rif <sup>S</sup> , Thi <sup>-</sup> , Lac <sup>-</sup> , Ara <sup>+</sup> , Gal <sup>+</sup> , Mtl <sup>-</sup> , F <sup>-</sup> , RecA <sup>+</sup> , Uvr <sup>+</sup> , Lon <sup>+</sup>          | pREP4 (A)                                     | Qiagen             |
|                                                                    | SJH-1890          | SG13009/pREP4                                                                          | NaI <sup>S</sup> , Str <sup>S</sup> , Rif <sup>S</sup> , Thi <sup>-</sup> , Lac <sup>-</sup> , Ara <sup>+</sup> , Gal <sup>+</sup> , Mtl <sup>-</sup> , F <sup>-</sup> , RecA <sup>+</sup> , Uvr <sup>+</sup> , Lon <sup>+</sup>          | pREP4 (A)                                     | Qiagen             |
| <b>G. <i>E. coli</i> strains expressing recombinant Ebp pilins</b> | SJH-1987          | M15/pQE-30Xa-EbpA-X/pREP4                                                              | NaI <sup>S</sup> , Str <sup>S</sup> , Rif <sup>S</sup> , Thi <sup>-</sup> , Lac <sup>-</sup> , Ara <sup>+</sup> , Gal <sup>+</sup> , Mtl <sup>-</sup> , F <sup>-</sup> , RecA <sup>+</sup> , Uvr <sup>+</sup> , Lon <sup>+</sup>          | pREP4(A), pSJH-541 (J)                        | This study         |
|                                                                    | SJH-1988          | M15/pQE-30Xa-EbpB-X/pREP4                                                              | NaI <sup>S</sup> , Str <sup>S</sup> , Rif <sup>S</sup> , Thi <sup>-</sup> , Lac <sup>-</sup> , Ara <sup>+</sup> , Gal <sup>+</sup> , Mtl <sup>-</sup> , F <sup>-</sup> , RecA <sup>+</sup> , Uvr <sup>+</sup> , Lon <sup>+</sup>          | pREP4 (A), pSJH-547 (J)                       | This study         |
|                                                                    | SJH-1985          | SG13009/pQE-30Xa-EbpCA-X/pREP4                                                         | NaI <sup>S</sup> , Str <sup>S</sup> , Rif <sup>S</sup> , Thi <sup>-</sup> , Lac <sup>-</sup> , Ara <sup>+</sup> , Gal <sup>+</sup> , Mtl <sup>-</sup> , F <sup>-</sup> , RecA <sup>+</sup> , Uvr <sup>+</sup> , Lon <sup>+</sup>          | pREP4 (A), pSJH-550 (J)                       | This study         |

<sup>a</sup> Rif (100 ug mL<sup>-1</sup>), Fus (fusidic acid, 100 ug mL<sup>-1</sup>), Str - streptomycin (500 μg mL<sup>-1</sup>)

<sup>b</sup> For *E. faecalis* strains generated in this study (sections B-D), any mutant allele present in the genome is listed in parentheses and described in Table S4 (sections A-B).

<sup>c</sup> The Δ*srtA* allele is described in (4).

<sup>d</sup> A letter in parentheses refers to the section of Table S2 where the noted plasmid is described.

## REFERENCES

1. Dunny GM, Brown GL, Clewell DB. 1978. Proc. Natl. Acad. Sci. U. S. A. **75**:3479-3483.
2. Ike Y, Craig RA, White BA, Yagi Y, Clewell DB. 1983. Proc. Natl. Acad. Sci. U. S. A. **80**:5369-5373.
3. Guiton PS, et al. 2009. Infect. Immun. **77**:3626-3638.
4. Kline KA, et al. 2009. J. Bacteriol. **191**:3237-3247.
