# Supplementary material for: The Metal Ion-Dependent Adhesion Site Motif of the Enterococcus faecalis EbpA Pilin Mediates Pilus Function in Catheter-Associated Urinary Tract Infection
Source: PubMed Central journal article supplement — mBio. 2012 Jul 24;3(4):e00177-12. doi: 10.1128/mBio.00177-12 (PMC3419518; doi:10.1128/mbio.00177-12), 2012-07-24
Supplement: mbo004121300st2.pdf [file mbo004121300st2.pdf]

**Table S2. Plasmids used in this study.**

|                                                       | Plasmid identifier | Plasmid common name         | Method used to derive from parent plasmid <sup>a-b</sup> | Parent plasmid | Antibiotic resistance <sup>c</sup> | Reference/source | Plasmid use in this study                                                                                          |
|-------------------------------------------------------|--------------------|-----------------------------|----------------------------------------------------------|----------------|------------------------------------|------------------|--------------------------------------------------------------------------------------------------------------------|
| <b>A. Commercial vectors</b>                          | n/a                | pCR-Blunt                   | n/a                                                      | n/a            | Kan                                | Invitrogen       | Blunt-end cloning (see section E)                                                                                  |
|                                                       | n/a                | pPCR-Script Amp (SK+)       | n/a                                                      | n/a            | Amp                                | Stratagene       | Blunt-end cloning (see section F)                                                                                  |
|                                                       | n/a                | pREP4                       | n/a                                                      | n/a            | Kan                                | Qiagen           | Encodes <i>lac</i> repressor to prevent expression from pQE-30Xa-derived plasmids (see Table S1 sections F-G)      |
|                                                       | n/a                | pQE-30Xa                    | n/a                                                      | n/a            | Amp                                | Qiagen           | IPTG-inducible expression of recombinant Ebp pilins with an N-terminal RGS-6×His tag in <i>E. coli</i> (section J) |
| <b>B. Vectors used in the construction of pGCP213</b> | n/a                | pCR2.1                      | n/a                                                      | n/a            | Amp, Kan                           | Invitrogen       | Used in the construction of pGCP213 (see Text S1)                                                                  |
|                                                       | n/a                | pCR2.2                      | See Text S1                                              | pCR2.1         | Amp, Kan                           | This study       | Used in the construction of pGCP213                                                                                |
|                                                       | n/a                | pCR2.3                      | See Text S1                                              | pCR2.2         | Amp, Kan                           | This study       | Used in the construction of pGCP213                                                                                |
| <b>C. Published gram-positive cloning vectors</b>     | pSJH-460           | pJRS233                     | n/a                                                      | n/a            | Erm                                | (1)              | Gram-positive temp-sensitive shuttle vector used for allelic replacement (see section G)                           |
|                                                       | pSJH-191           | pABG5                       | n/a                                                      | n/a            | Kan, Cam                           | (2)              | Gram-positive expression vector                                                                                    |
| <b>D. Gram-positive cloning vectors derived here</b>  | pSJH-329           | pGCP123                     | See Text S1.                                             | pABG5          | Kan                                | This study       | Gram-positive expression vector (see section I)                                                                    |
|                                                       | pSJH-461           | pGCP213                     | See Text S1.                                             | pJRS233        | Erm                                | This study       | Gram-positive, temp.-sensitive shuttle vector used for allelic replacement in <i>E. faecalis</i> (see section H)   |
| <b>E. pCR-Blunt derivatives</b>                       | pSJH-516           | pCR-Blunt-EbpCA-X           | Blunt-end ligation with EbpCA-X construct                | pCR-Blunt      | Kan                                | This study       | Source of insert for pQE-30Xa-EbpCA-X (pSJH-550)                                                                   |
|                                                       | pSJH-518           | pCR-Blunt- $\Delta$ ebpC    | Blunt-end ligation with $\Delta$ ebpC allele             | pCR-Blunt      | Kan                                | This study       | Source of insert for pJRS233- $\Delta$ ebpC (pSJH-523)                                                             |
|                                                       | pSJH-520           | pCR-Blunt- $\Delta$ ebpABC  | Blunt-end ligation with $\Delta$ ebpABC allele           | pCR-Blunt      | Kan                                | This study       | Source of insert for pJRS233- $\Delta$ ebpABC (pSJH-524)                                                           |
| <b>F. pPCR-Script Amp (SK+) derivatives</b>           | pSJH-533           | pPCR-Script- $\Delta$ ebpA  | Blunt-end ligation with $\Delta$ ebpA allele             | pPCR-Script    | Amp                                | This study       | Source of insert for pJRS233- $\Delta$ ebpA (pSJH-529)                                                             |
|                                                       | pSJH-534           | pPCR-Script- $\Delta$ ebpB  | Blunt-end ligation with $\Delta$ ebpB allele             | pPCR-Script    | Amp                                | This study       | Source of insert for pJRS233- $\Delta$ ebpB (pSJH-530)                                                             |
|                                                       | pSJH-535           | pPCR-Script- $\Delta$ ebpAB | Blunt-end ligation with $\Delta$ ebpAB allele            | pPCR-Script    | Amp                                | This study       | Source of insert for pJRS233- $\Delta$ ebpAB (pSJH-531)                                                            |
|                                                       | pSJH-536           | pPCR-Script- $\Delta$ ebpBC | Blunt-end ligation with $\Delta$ ebpBC allele            | pPCR-Script    | Amp                                | This study       | Source of insert for pJRS233- $\Delta$ ebpBC (pSJH-532)                                                            |
|                                                       | pSJH-542           | pPCR-Script-EbpA-X          | Blunt-end ligation with EbpA-X construct                 | pPCR-Script    | Amp                                | This study       | Source of insert for pQE-30Xa-EbpA-X (pSJH-541)                                                                    |

|                                                             | Plasmid identifier | Plasmid common name            | Method used to derive from parent plasmid <sup>a-b</sup>              | Parent plasmid | Antibiotic resistance <sup>c</sup> | Reference/source | Plasmid use in this study                                                                           |
|-------------------------------------------------------------|--------------------|--------------------------------|-----------------------------------------------------------------------|----------------|------------------------------------|------------------|-----------------------------------------------------------------------------------------------------|
| <b>G. pJRS233 derivatives</b>                               | pSJH-189           | pJRS233- $\Delta$ srtC         | Ligation with $\Delta$ srtC allele (XbaI)                             | pJRS233        | Erm                                | (3)              | Creation of SrtC <sup>-</sup> and SrtC <sup>-</sup> SrtA <sup>-</sup> strains (SJH1424 and SJH2010) |
|                                                             | pSJH-279           | pJRS233- $\Delta$ ebpABCsrtC   | Ligation with $\Delta$ ebpABCsrtC allele (XbaI)                       | pJRS233        | Erm                                | This study       | Creation of EbpABC <sup>-</sup> SrtC <sup>-</sup> strain (SJH1995)                                  |
|                                                             | pSJH-523           | pJRS233- $\Delta$ ebpC         | Ligation with pSJH-518 insert (XbaI, Sall)                            | pJRS233        | Erm                                | This study       | Creation of EbpC <sup>-</sup> strain (SJH1424)                                                      |
|                                                             | pSJH-524           | pJRS233- $\Delta$ ebpABC       | Ligation with pSJH-520 insert (XbaI, Sall)                            | pJRS233        | Erm                                | This study       | Creation of EbpABC <sup>-</sup> strain (SJH1422)                                                    |
|                                                             | pSJH-529           | pJRS233- $\Delta$ ebpA         | Ligation with pSJH-533 insert (XbaI, Sall)                            | pJRS233        | Erm                                | This study       | Creation of EbpA <sup>-</sup> and EbpAC <sup>-</sup> strains (SJH1996 and SJH1999)                  |
|                                                             | pSJH-530           | pJRS233- $\Delta$ ebpB         | Ligation with pSJH-534 insert (XbaI, Sall)                            | pJRS233        | Erm                                | This study       | Creation of EbpB <sup>-</sup> strain (SJH1997)                                                      |
|                                                             | pSJH-531           | pJRS233- $\Delta$ ebpAB        | Ligation with pSJH-535 insert (XbaI, Sall)                            | pJRS233        | Erm                                | This study       | Creation of EbpAB <sup>-</sup> strain (SJH2000)                                                     |
|                                                             | pSJH-532           | pJRS233- $\Delta$ ebpBC        | Ligation with pSJH-536 insert (XbaI, Sall)                            | pJRS233        | Erm                                | This study       | Creation of EbpBC <sup>-</sup> strain (SJH1998)                                                     |
| <b>H. pGCP213 derivative</b>                                | pSJH-509           | pGCP213-ebpA <sup>AWAGA</sup>  | Ligation with ebpA <sup>AWAGA</sup> allele (XbaI, XhoI)               | pGCP213        | Erm                                | This study       | Creation of EbpA <sup>AWAGA</sup> strain (SJH2001)                                                  |
| <b>I. pGCP123 derivatives with the native ebpA promoter</b> | pSJH-491           | p-ebpABC                       | Ligation with ebpAp-ebpABC construct (XhoI, XmaI)                     | pGCP123        | Kan                                | This study       | Expression of EbpA, EbpB, and EbpC in <i>E. faecalis</i>                                            |
|                                                             | pSJH-492           | p-ebpAB                        | Ligation with ebpAp-ebpAB construct (XhoI, XmaI)                      | pGCP123        | Kan                                | This study       | Expression of EbpA and EbpB in <i>E. faecalis</i>                                                   |
|                                                             | pSJH-496           | p-ebpABCsrtC                   | Ligation with ebpB (internal)-ebpC-srtC construct (StuI, XmaI)        | p-ebpABC       | Kan                                | This study       | Expression of EbpA, EbpB, EbpC, and SrtC in <i>E. faecalis</i>                                      |
|                                                             | pSJH-559           | p-ebpA <sup>AWAGA</sup> BCsrtC | Ligation with ebpA <sup>AWAGA</sup> (internal) construct (SfoI, SbfI) | p-ebpABCsrtC   | Kan                                | This study       | Expression of EbpA <sup>D315A, S317A, S319A</sup> , EbpB, EbpC, and SrtC in <i>E. faecalis</i>      |
| <b>J. QE-30Xa derivatives</b>                               | pSJH-541           | pQE-30Xa-EbpA-X                | Ligation with pSJH-542 insert (BamHI, Sall)                           | pQE-30Xa       | Amp                                | This study       | IPTG-inducible expression of N-term <sup>d</sup> :EbpA <sup>634-1117</sup> in <i>E. coli</i>        |
|                                                             | pSJH-547           | pQE-30Xa-EbpB-X                | Ligation with EbpB-X construct (SphI, PstI)                           | pQE-30Xa       | Amp                                | This study       | IPTG-inducible expression of N-term <sup>d</sup> :EbpB <sup>27-488</sup> in <i>E. coli</i>          |
|                                                             | pSJH-550           | pQE-30Xa-EbpCA-X               | Ligation with pSJH-516 insert (BamHI, SacI)                           | pQE-30Xa       | Amp                                | This study       | IPTG-inducible expression of N-term <sup>d</sup> :EbpC <sup>33-592</sup> in <i>E. coli</i>          |

<sup>a</sup> For sections E-F, plasmids were derived by blunt-end cloning into the parent plasmid with the noted allele or construct (see Table S4).

<sup>b</sup> For sections G-J, plasmids were derived by digestion of both the parent plasmid and the noted insert (see sections E-F) or allele/construct (see Table S4) with the restriction enzymes listed in parentheses and subsequent ligation.

<sup>c</sup> Kan (kanamycin); Amp (ampicillin); Erm (erythromycin); Cam (chloramphenicol); concentrations used for growth of plasmid-carrying strains are listed in the main text Materials and Methods.

<sup>d</sup> See Table S4 section D for the N-terminal amino acid sequence (N-term) added to the recombinant Ebp pilins by pQE-30Xa.

## REFERENCES

1. **Perez-Casal J, Price JA, Maguin E, Scott JR.** 1993. *Mol. Microbiol.* **8**:809-819.
2. **Granok AB, Parsonage D, Ross RP, Caparon MG.** 2000. *J. Bacteriol.* **182**:1529-1540.
3. **Kline KA, et al.** 2009. *J. Bacteriol.* **191**:3237-3247.
