# Supplementary material for: The Metal Ion-Dependent Adhesion Site Motif of the Enterococcus faecalis EbpA Pilin Mediates Pilus Function in Catheter-Associated Urinary Tract Infection
Source: PubMed Central journal article supplement — mBio. 2012 Jul 24;3(4):e00177-12. doi: 10.1128/mBio.00177-12 (PMC3419518; doi:10.1128/mbio.00177-12), 2012-07-24
Supplement: mbo004121300st3.pdf [file mbo004121300st3.pdf]

Table S3. Primers used in this study.

|                                                                          | Primer name                                         | Primer sequence (5' → 3') <sup>c-f</sup>                                                        | Type <sup>g-i</sup> | Restriction site(s) | Reference  |
|--------------------------------------------------------------------------|-----------------------------------------------------|-------------------------------------------------------------------------------------------------|---------------------|---------------------|------------|
| <b>A. Primers used to generate chromosomal deletion alleles</b>          | EF1094 sew-f <sup>a1</sup>                          | CTGTCCCAGGCTcTCATGCTTTATTTTTAAGGAGGAAGCA/<br>TAGTATGACGAAAAGGCTAAACATACTAAAAAAAAGAG             | DS-f                |                     | (1)        |
|                                                                          | EF1094 sew-r <sup>a1</sup>                          | CTCTTTTTTTAGTATGTTTAGCCTTTTCGTCATACTA/<br>TGCTTCCTCCTTAAAAATAAAGCATGA <sub>g</sub> AGCCTGGGACAG | US-r                |                     | (1)        |
|                                                                          | EF1094e-f3 <sup>a2</sup>                            | <u>gctctaga</u> ATAACGTGACTTCTGGAGAGTATGc <sub>i</sub> TATGC                                    | US-f                | <b>XbaI</b>         | (1)        |
|                                                                          | EF1094e-r3                                          | <u>gctctaga</u> CGCGGAACAAAGGAGCTAAAACTTAATAGAATA                                               | DS-r                | <b>XbaI</b>         | (1)        |
|                                                                          | HNV001                                              | tccccgggtctagaACGTTGTTGAAATCCTTGATG                                                             | US-f                | <b>XbaI, SmaI</b>   | This study |
|                                                                          | HVN002                                              | TGCGTTTTTCATTGATTACACACT/ATCATTCTCATCTGTTATCATTGAG                                              | US-r                |                     | This study |
|                                                                          | HVN003                                              | CTCAAATGATAACAGATGAGAATGAT/AGTGTGTAATCAATGAAAAACGCA                                             | DS-f                |                     | This study |
|                                                                          | HVN004                                              | gcggtctgacgcgtTACCATCCCAATGATTAGCAGGCC                                                          | DS-r                | <b>SalI</b>         | This study |
|                                                                          | HVN005                                              | CCAAATGACTACCATCCCAAT/ATCATTCTCATCTGTTATCATTGAGCGG                                              | US-r                |                     | This study |
|                                                                          | HVN006                                              | CCGCTCAAATGATAACAGATGAGAATGAT/ATTGGGATGGTAGTCATTG                                               | DS-f                |                     | This study |
|                                                                          | HVN007                                              | CGGTGATGCTAGAAATTAAGCATT/ATCATTCTCATCTGTTATCATTGAG                                              | US-r                |                     | This study |
|                                                                          | HVN008                                              | CTCAAATGATAACAGATGAGAATGAT/AATGCTTAATTTCTAGCATCACCG                                             | DS-f                |                     | This study |
|                                                                          | HVN009                                              | tccccgggtctagaAATGTTCAAACAACATTAGTGG                                                            | US-f                | <b>XbaI, SmaI</b>   | This study |
|                                                                          | HVN010                                              | CCAAATGACTACCATCCCAAT/CATTGATTACACACTCCCTTCTGG                                                  | US-r                |                     | This study |
|                                                                          | HVN011                                              | CCAGAAGGGAGTGTGTAATCAATG/ATTGGGATGGTAGTCATTG                                                    | DS-f                |                     | This study |
|                                                                          | HVN012                                              | gcggtctgacgcgtAATAAGTAGCAAGACTGCGCCAC                                                           | DS-r                | <b>SalI</b>         | This study |
|                                                                          | HVN013                                              | CGGTGATGCTAGAAATTAAGCATT/CATTGATTACACACTCCCTTCTGG                                               | US-r                |                     | This study |
|                                                                          | HVN014                                              | CCAGAAGGGAGTGTGTAATCAATG/AATGCTTAATTTCTAGCATCACCG                                               | DS-f                |                     | This study |
|                                                                          | HVN015 <sup>a3</sup>                                | tccccgggtctagaAAAGCTAGcAACCTAGTAGTG                                                             | US-f                | <b>XbaI, SmaI</b>   | This study |
|                                                                          | HVN016                                              | CTTCGGTGATGCTAGAAATTAAGCATT/AATTGCTTCATTTCTCTCT                                                 | US-r                |                     | This study |
| HVN017                                                                   | AGAGAGAAAATGAAGCAATT/AAATGCTTAATTTCTAGCATCACCGAAG   | DS-f                                                                                            |                     | This study          |            |
| HVN018                                                                   | gcggtctgacgcgtTCGATTGATTGGCCCTTTGTCCG               | DS-r                                                                                            | <b>SalI</b>         | This study          |            |
| HVN078                                                                   | CTCTTTTTTTAGTATGTTTAGCC/ATCATTCTCATCTGTTATCATTGAG   | US-r                                                                                            |                     | This study          |            |
| HVN079                                                                   | CTCAAATGATAACAGATGAGAATGAT/GGCTAAACATACTAAAAAAAAGAG | DS-f                                                                                            |                     | This study          |            |
| <b>B. Primers used to generate chromosomal MIDAS motif mutant allele</b> | HVN226                                              | <u>gctctaga</u> CAGAGCAGCCATTACAACGA                                                            | US-f                | <b>XbaI</b>         | This study |
|                                                                          | HVN227                                              | ccgctcgagCCTGAACAGGACCCACACTT                                                                   | DS-R                | <b>XhoI</b>         | This study |
|                                                                          | HVN228 <sup>b</sup>                                 | GGATTTGGTCTTAGTCGTT(g)GcCTGGgCCGGAgcTATGAATGAAAACAATCGGATT                                      | DS-f                |                     | This study |
|                                                                          | HVN229 <sup>b</sup>                                 | AATCCGATTGTTTTTCATTCATAg <sub>c</sub> TCCGGcCCAGg <sub>c</sub> (c)AACGACTAAGACCAAATCC           | US-r                |                     | This study |
|                                                                          | HVN241                                              | GGATTTGGTCTTAGTCGTTGcCTGGgCCG                                                                   | SDM (sense)         |                     | This study |
|                                                                          | HVN242                                              | CGGcCCAGgCAACGACTAAGACCAAATCC                                                                   | SDM (antisense)     |                     | This study |

|                                                                             | Primer name | Primer sequence (5' → 3') <sup>c-f</sup>              | Type <sup>g-i</sup> | Restriction site(s) | Reference  |
|-----------------------------------------------------------------------------|-------------|-------------------------------------------------------|---------------------|---------------------|------------|
| <b>C. Primers used to generate <i>E. faecalis</i> expression constructs</b> | HVN080      | <i>gcgggatcc</i> ATAACAGTAGAGGATTCTGCTAAA             | f                   | <i>Bam</i> HI       | This study |
|                                                                             | HVN145      | <i>ccgccgctcgag</i> ATAAACTCATGGAGCAATTGG             | f; US-f             | <i>Xho</i> I        | This study |
|                                                                             | HVN147      | <i>tccccccggg</i> TCATTTCTCTCTCTCTTTTGG               | r                   | <i>Xma</i> I        | This study |
|                                                                             | HVN150      | <i>tccccccggg</i> TAAAGCATTTTCTTTTCTACG               | r                   | <i>Xma</i> I        | This study |
|                                                                             | HVN184      | <i>tccccccggg</i> CTACTTTGGTTTTCTGGTCGTC              | r                   | <i>Xma</i> I        | This study |
|                                                                             | HVN201      | <i>aaaAGGCCT</i> GCTAATCATTGGGATGGTAGTC               | f                   | <i>Stu</i> I        | This study |
|                                                                             | HVN230      | <i>agcttCCTGCAGG</i> TGCTTTTACTTCAGTTAATGTATAGCG      | r                   | <i>Sbf</i> I        | This study |
| <b>D. Primers used to generate <i>E. coli</i> expression constructs</b>     | EF1093A Fw  | <i>gcgggatcc</i> GAAGAAAATGGGGAGAGCGC                 | f                   | <i>Bam</i> HI       | (2)        |
|                                                                             | EF1093A Rev | <i>gcgggagctt</i> aGGTACCTTTGTGTTTGTGG                | r                   | <i>Sac</i> I        | (2)        |
|                                                                             | HVN107      | <i>ccgcatgc</i> GCATCGCAAGCAAGCGTTCAAG                | f                   | <i>Sph</i> I        | This study |
|                                                                             | HVN108      | <i>ccctgcagtt</i> aAATAGAACGTTCTTCATTTG               | r                   | <i>Pst</i> I        | This study |
|                                                                             | HVN114      | <i>gcgggatcc</i> ATGAATGGTCGGACAACGTTTCAGCC           | f                   | <i>Bam</i> HI       | This study |
|                                                                             | HVN117      | <i>ccgtcgactt</i> aCAAGCGTCCTATGCCACCAGTTTCAGG        | r                   | <i>Sal</i> I        | This study |
| <b>E. Primers used in pGCP123 construction</b>                              | GP133       | <i>gctgcatgctc</i> gatttttataaaacgtctc                |                     | <i>Sph</i> I        | This study |
|                                                                             | GP134       | <i>gctagatctt</i> ccgtcgatactatgttatacg               |                     | <i>Bgl</i> II       | This study |
|                                                                             | GP135       | <i>gctagatctg</i> taaaacgacggccag                     |                     | <i>Bgl</i> II       | This study |
|                                                                             | GP136       | <i>gctgcatgcc</i> caggaacagctatgac                    |                     | <i>Sph</i> I        | This study |
| <b>F. Primers used in pGCP213 construction</b>                              | oJoy80      | <i>gatatgattac</i> gccaaagcttggtagcagctcggatcc        | 5'-P                | <i>Cla</i> I        | This study |
|                                                                             | oJoy81      | <i>gatggcatagct</i> gttccctgtgtgaaattgtatccg          | 5'-P                | <i>Cla</i> I        | This study |
|                                                                             | GP240       | <i>ctgcagatatecatcacacaggcctt</i> ggcggccgctcgagcatgc | SDM (sense)         | <i>Stu</i> I        | This study |
|                                                                             | GP241       | <i>gcatgctcgagcggccccaaggcctt</i> gtgtgatggatatctgcag | SDM (antisense)     | <i>Stu</i> I        | This study |
|                                                                             | GP224       | <i>gtacgcgt</i> cccgtagaaaagatcaaaagg                 |                     | <i>Mlu</i> I        | This study |
|                                                                             | GP225       | <i>gctagatctg</i> gcaagtgtagcgtcac                    |                     | <i>Bgl</i> II       | This study |
|                                                                             | GP226       | <i>gtacgcgtt</i> ccctcccttaacttacttataaat             |                     | <i>Mlu</i> I        | This study |
|                                                                             | GP227       | <i>gctagatctt</i> tattaatcgcaacatcaaacc               |                     | <i>Bgl</i> II       | This study |

<sup>a1-a3</sup> Primer was designed to anneal to *E. faecalis* V583 sequence, resulting in the following DNA mutations in OG1RF strains: 1) C to T mutation in the *ebpC-srtC* intergenic region in SrtC<sup>-</sup>, 2) silent mutation in A386 of EbpC in SrtC<sup>-</sup>, and 3) silent mutation in S155 and a M159V transmutation in EbpB in EbpC<sup>-</sup>.

<sup>b</sup> An aberrantly added base in HVN228/HVN229 is in parentheses and was removed using SDM with primers HVN241/HVN242 to yield pSJH-509.

<sup>c</sup> Uppercase sequence anneals to the OG1RF chromosome.

<sup>d</sup> A forward slash is inserted in primers where chromosomal sequence was deleted.

<sup>e</sup> XbaI, SalI, AatII, SbfI, BglII, and PstI restriction sites are underlined and bolded; SmaI, XhoI, XmaI, BamHI, and SphI restriction sites are shown in bolded, italics type.

<sup>f</sup> MIDAS motif sequence is underlined but not bolded.

<sup>g</sup> Primers are categorized as forward (f) or reverse (r) (or sense or antisense for SDM) relative to the direction of *ebp* transcription.

<sup>h</sup> US (upstream) or DS (downstream) refers to the relevant splice segment for SOE-PCR primers.

<sup>i</sup> 5'-P denotes 5' phosphorylation of the primer.

## REFERENCES

1. Kline KA, et al. 2009. J. Bacteriol. **191**:3237-3247.
2. Sillanpää J, Xu Y, Nallapareddy SR, Murray BE, Höök M. 2004. Microbiology. **150**:2069-2078.
