# Supplementary material for: The Metal Ion-Dependent Adhesion Site Motif of the Enterococcus faecalis EbpA Pilin Mediates Pilus Function in Catheter-Associated Urinary Tract Infection
Source: PubMed Central journal article supplement — mBio. 2012 Jul 24;3(4):e00177-12. doi: 10.1128/mBio.00177-12 (PMC3419518; doi:10.1128/mbio.00177-12), 2012-07-24
Supplement: mbo004121300st4.pdf [file mbo004121300st4.pdf]

**Table S4. Alleles and constructs used in this study.**

|                                                  | Allele/ construct name                  | Predicted protein product(s) <sup>a</sup>              | Method used to generate (template gDNA) | Primers used to generate allele/construct (see Table S3) <sup>c-d</sup> |              |              |             | Plasmids containing allele/construct <sup>e</sup> |                            |
|--------------------------------------------------|-----------------------------------------|--------------------------------------------------------|-----------------------------------------|-------------------------------------------------------------------------|--------------|--------------|-------------|---------------------------------------------------|----------------------------|
|                                                  |                                         |                                                        |                                         | US forward                                                              | US reverse   | DS forward   | DS reverse  | Blunt-end cloning vector                          | Final plasmid <sup>f</sup> |
| <b>A. In-frame, chromosomal deletion alleles</b> | $\Delta$ <i>ebpA</i>                    | EbpA <sup>1-47:1142-1143</sup>                         | SOE-PCR (OG1RF)                         | HVN001                                                                  | HVN002       | HVN003       | HVN004      | pSJH-533 (F)                                      | pSJH-529 (G)               |
|                                                  | $\Delta$ <i>ebpB</i>                    | EbpB <sup>1:458-476</sup>                              | SOE-PCR (OG1RF)                         | HVN009                                                                  | HVN010       | HVN011       | HVN012      | pSJH-534 (F)                                      | pSJH-530 (G)               |
|                                                  | $\Delta$ <i>ebpC</i>                    | EbpC <sup>1-4:624-625</sup>                            | SOE-PCR (OG1X)                          | HVN015                                                                  | HVN016       | HVN017       | HVN018      | pSJH-518 (E)                                      | pSJH-523 (G)               |
|                                                  | $\Delta$ <i>ebpAB</i>                   | EbpA <sup>1-47</sup> :EbpB <sup>458-476</sup>          | SOE-PCR (OG1RF)                         | HVN001                                                                  | HVN005       | HVN006       | HVN012      | pSJH-535 (F)                                      | pSJH-531 (G)               |
|                                                  | $\Delta$ <i>ebpBC</i>                   | EbpB <sup>1</sup> :EbpC <sup>624-625</sup>             | SOE-PCR (OG1X)                          | HVN009                                                                  | HVN013       | HVN014       | HVN018      | pSJH-536 (F)                                      | pSJH-532 (G)               |
|                                                  | $\Delta$ <i>ebpABC</i>                  | EbpA <sup>1-47</sup> :EbpC <sup>624-625</sup>          | SOE-PCR (OG1X)                          | HVN001                                                                  | HVN007       | HVN008       | HVN018      | pSJH-520 (E)                                      | pSJH-524 (G)               |
|                                                  | $\Delta$ <i>ebpABCsrtC</i>              | EbpA <sup>1-47</sup>                                   | SOE-PCR (OG1RF)                         | HVN001                                                                  | HVN078       | HVN079       | EF1094e-r3  | n/a                                               | pSJH-279 (G)               |
|                                                  | $\Delta$ <i>srtC</i>                    | None; entire ORF deleted                               | SOE-PCR (OG1X)                          | EF1094e-f3                                                              | EF1094 sew-r | EF1094 sew-f | EF1094e-r3  | n/a                                               | pSJH-189 (G)               |
| <b>B. MIDAS motif mutant allele</b>              | <i>ebpA</i> <sup>AWAGA</sup>            | EbpA <sup>D315A, S317A, S319A</sup>                    | SOE-PCR (OG1RF)                         | HVN226                                                                  | HVN229       | HVN228       | HVN227      | n/a                                               | pSJH-509 (H)               |
| <b>C. E. faecalis expression constructs</b>      | <i>ebpAp-ebpABC</i>                     | EbpA, EbpB, EbpC                                       | PCR (OG1RF)                             | HVN145                                                                  | n/a          | n/a          | HVN150      | n/a                                               | pSJH-491 (I)               |
|                                                  | <i>ebpAp-ebpAB</i>                      | EbpA, EbpB                                             | PCR (OG1RF)                             | HVN145                                                                  | n/a          | n/a          | HVN147      | n/a                                               | pSJH-492 (I)               |
|                                                  | <i>ebpB(internal)-ebpC-srtC</i>         | EbpA, EbpB, EbpC, SrtC                                 | PCR (OG1RF)                             | HVN201                                                                  | n/a          | n/a          | HVN184      | n/a                                               | pSJH-496 (I)               |
|                                                  | <i>ebpA</i> <sup>AWAGA</sup> (internal) | EbpA <sup>D315A, S317A, S319A</sup> , EbpB, EbpC, SrtC | PCR (EbpA <sup>AWAGA</sup> )            | HVN080                                                                  | n/a          | n/a          | HVN230      | n/a                                               | pSJH-559 (I)               |
| <b>D. E. coli expression constructs</b>          | EbpA-X                                  | N-term <sup>b</sup> :EbpA <sup>634-1117</sup>          | PCR (OG1RF)                             | HVN117                                                                  | n/a          | n/a          | HVN118      | pSJH-542 (F)                                      | pSJH-541 (J)               |
|                                                  | EbpB-X                                  | N-term <sup>b</sup> :EbpB <sup>27-488</sup>            | PCR (OG1RF)                             | HVN107                                                                  | n/a          | n/a          | HVN108      | n/a                                               | pSJH-547 (J)               |
|                                                  | EbpCA-X                                 | N-term <sup>b</sup> :EbpC <sup>333-592</sup>           | PCR (OG1RF)                             | EF1093A Fw                                                              | n/a          | n/a          | EF1093A Rev | pSJH-516 (E)                                      | pSJH-550 (J)               |

<sup>a</sup> Protein products predicted to be generated from mutant alleles once incorporated into the *E. faecalis* chromosome (sections A-B) or from final plasmids containing the respective expression constructs (sections C-D). A colon denotes a fusion of non-consecutive amino acids within the same protein or from two different proteins.

<sup>b</sup> The N-terminal amino acid sequence (N-term) added by the pQE-30Xa vector is: **RGS**HHHHHHGSGSGSGIEGRPYNGTG(SA)-. The RGS-6×His tag is bolded, the Factor Xa cleavage recognition site is underlined, and the residues in parentheses are only present in the EbpB-X construct.

<sup>c</sup> For SOE-PCR, PCRs to generate US and DS fragments using the respective forward and reverse primers were performed first. Products were mixed in 1:1 molar ratios and used as template for the SOE-PCR reaction with the US forward and DS reverse primers.

<sup>d</sup> Primers listed in sections A, B, C, and D of this table are described in the same sections of Table S3.

<sup>e</sup> The letter in parentheses refers to the section of Table S2 where the noted plasmid is described.

<sup>f</sup> Final plasmids are derivatives of pJRS233 (section A), pGCP213 (section B), pGCP123 (section C), or pQE-30Xa (section D).
